# Supplementary material for: Ethnophytotherapeutical research in the high Molise region (Central-Southern Italy)
Source: PubMed Central journal article supplement (PMC2322956; doi:10.1186/1746-4269-4-7), 2008-03-11
Supplement: 1746-4269-4-7-S1.pdf [file 1746-4269-4-7-S1.pdf]

Additional file 1. Medicinal, anti-parasitic and ritual uses of plants in the high Molise region

| <i>Family, scientific name, voucher specimen</i> | <i>Vernacular names</i>     | <i>Parts used</i>    | <i>Preparation</i>                  | <i>Local uses</i>                                           | <i>Number of informants and locality</i> | <i>Present use</i> | <i>Period of gathering</i> | <i>Habitat</i>           |
|--------------------------------------------------|-----------------------------|----------------------|-------------------------------------|-------------------------------------------------------------|------------------------------------------|--------------------|----------------------------|--------------------------|
| <b>FUNGI</b>                                     |                             |                      |                                     |                                                             |                                          |                    |                            |                          |
| <b>Lycoperdaceae</b>                             |                             |                      |                                     |                                                             |                                          |                    |                            |                          |
| <i>Lycoperdon</i> sp.                            | Véscia d' lùpo              | Spores               | Fresh spores on open wounds         | As anti-haemorrhagic and antiseptic                         | 8 (VG)                                   | No                 | Sp-Su-Fa                   | Mopa                     |
| <b>Saccharomicetaceae</b>                        |                             |                      |                                     |                                                             |                                          |                    |                            |                          |
| <i>Saccharomices cerevisiae</i> Rees.            | Lievito                     | Thallus              | Mixed with water to form a cream    | Applied on gum abscesses to "ripen" them                    | 4 (VG)                                   | No                 | Al                         | -                        |
| <b>MUSCI</b>                                     |                             |                      |                                     |                                                             |                                          |                    |                            |                          |
| <i>Musci</i> sp. pl.                             |                             | Entire dry thallus   | Crumbled without hearth             | As anti-haemorrhagic and cicatrising agent                  | 4 (VG)                                   | No                 | Sp-Su-Fa                   | Wo                       |
| <b>LICHENES</b>                                  |                             |                      |                                     |                                                             |                                          |                    |                            |                          |
| <b>Stictaceae</b>                                |                             |                      |                                     |                                                             |                                          |                    |                            |                          |
| <i>Lobaria pulmonaria</i> (L.) Hoffm. - MEB10    | Lichene polmonario          | Fresh or dry thallus | Chewed or crumbled on wounds (e.u.) | As a cicatrising agent and antiseptic                       | 8 (PI): fresh plant;<br>3 (PE): chewed   | Yes (rare)         | Al                         | <i>Abies alba</i> trunks |
| <b>PTERYDOPHYTA</b>                              |                             |                      |                                     |                                                             |                                          |                    |                            |                          |
| <b>Equisetaceae</b>                              |                             |                      |                                     |                                                             |                                          |                    |                            |                          |
| <i>Equisetum</i> sp.                             | Cùdille(AG)<br>Codella (PE) | Aerial part          | Decoction, up to 1lt./day (i.u.)    | To treat kidneys after surgical operation (as a depurative) | 1 (AG)                                   | No                 | Al                         | Da, Shpl                 |
|                                                  | Cudille(PI)                 | Aerial part          | Decoction                           | As a diuretic                                               | 2 (PI)                                   | No                 | Al                         |                          |
| <b>Adiantaceae</b>                               |                             |                      |                                     |                                                             |                                          |                    |                            |                          |
| <i>Adiantum capillus-veneris</i> L. - LU1        | Pil'evenere                 | Entire plant         | Decoction (i.u.)                    | To stop haemorrhages after childbirth                       | 6 (PI)                                   | No                 | Al                         | Da, we                   |
|                                                  | Pile e' Venere              | Entire plant         | Decoction (i.u.)                    | To soothe the pain in childbirth                            | 1 (PE)<br>1 (PI)                         | No                 |                            |                          |
| <b>Aspleniaceae</b>                              |                             |                      |                                     |                                                             |                                          |                    |                            |                          |
| <i>Asplenium trichomanes</i> L. - MED5           | Felce                       | Aerial part          | Infusion                            | To regularize menstruation                                  | 2 (CH)                                   | No                 | Al                         | Rock                     |
| <i>Ceterach officinarum</i> Willd. - MED4        |                             | Aerial part          | Infusion with chamomile             | After childbirth                                            | 1 (PI)                                   | No                 | Al                         | Rock, wa                 |

|                                                                      |                              |                   |                                                    |                                                                 |                            |    |                 |                               |
|----------------------------------------------------------------------|------------------------------|-------------------|----------------------------------------------------|-----------------------------------------------------------------|----------------------------|----|-----------------|-------------------------------|
| <b>Hypolepidaceae</b>                                                |                              |                   |                                                    |                                                                 |                            |    |                 |                               |
| <i>Pteridium aquilinum</i> (L.) Kuhn. subsp. <i>aquilinum</i> – MED6 | Felce                        | Aerial part       | Dipped in milk whey and hung in house              | To attract flies that stick to it; then the fern is thrown away | 6 (PI)                     | No | Al              | Da, shpl                      |
|                                                                      | Felce                        | Fresh aerial part | Put cross-shaped on the abdomen                    | For intestinal pains                                            | 2 (PI)                     | No |                 |                               |
|                                                                      |                              | Aerial part       | Hung in the house                                  | To remove flies                                                 | 5 (PG)<br>2 (PS)           | No |                 |                               |
| <b>GYMNOSPERMAE</b>                                                  |                              |                   |                                                    |                                                                 |                            |    |                 |                               |
| <b>Pinaceae</b>                                                      |                              |                   |                                                    |                                                                 |                            |    |                 |                               |
| <i>Abies alba</i> Miller MEC6                                        | Abete                        | Resin             | Heated (e.u.)                                      | To cicatrise bleeding wounds                                    | 4 (PI)<br>4 (VG)<br>1 (PE) | No | Sp-Su           | Wo with <i>Quercus cerris</i> |
|                                                                      |                              | Resin             | Applied mildly hot and left to cool (e.u.)         | Insect bites when the sting remains in the skin                 | 8 (PI)<br>4 (VG)<br>2 (PE) | No | Sp-Su           | and <i>Fagus</i>              |
|                                                                      |                              | Resin             | External use                                       | Rheumatic pains                                                 | 1 (PI)<br>2 (CH)           | No | Sp-Su           |                               |
|                                                                      |                              | Resin             | Put in bowling water at first (i.u.)               | Constipation and related pains                                  | 1 (AG)                     | No | Sp-beginning Su |                               |
|                                                                      |                              | Resin             | Burnt in houses or rooms of patients               | To purify the air                                               | 4 (VG)<br>2 (PI)           | No | Sp              |                               |
|                                                                      |                              | Resin             | Heated in a bain-marie, bandages then soaked in it | Applied to fractured limbs as a plaster                         | 4 (VG)<br>2 (PI)           | No | Sp              |                               |
| <b>ANGIOSPERMAE</b>                                                  |                              |                   |                                                    |                                                                 |                            |    |                 |                               |
| <b>Boraginaceae</b>                                                  |                              |                   |                                                    |                                                                 |                            |    |                 |                               |
| <i>Pulmonaria apennina</i> Cristof. & Puppi – MEB9                   |                              | Leaves            | Decoction: poultice on painful parts               | Illnesses of blood circulation                                  | 4 (VG)                     | No | Al              | Unc, da                       |
| <b>Caprifoliaceae</b>                                                |                              |                   |                                                    |                                                                 |                            |    |                 |                               |
| <i>Sambucus nigra</i> L. MEA14                                       | “Panerìcia” (inflorescence)  | Flowers           | Infusion (i.u.)                                    | Coughs, bronchitis                                              | 2 (VG)<br>1 (PE)<br>3 (PI) | No | Sp-Su           | Ro, coh                       |
| <i>Sambucus ebulus</i> L. MEA15                                      | Jèbbs (VG)<br>Palmùnere (PE) | Leaves            | Entire fresh leaves placed in shoes                | To prevent blisters and as a refreshing agent (e.u.)            | 3 (CA)<br>1 (PE)<br>4 (VG) | No | Sp-Su-Fa        | Ro, ru.                       |
| <b>Compositae</b>                                                    |                              |                   |                                                    |                                                                 |                            |    |                 |                               |
| <i>Achillea millefolium</i> L. MEB3                                  | Millefoglio                  | Entire plant      | Infusion (also decoction) (e.u.)                   | Gargles / mouthwashes for toothache                             | 2 (AG)                     | No | Sp-Su           | Da, me                        |

|                                                                                            |                |              |                                                                             |                                                                                                            |                            |     |                       |               |
|--------------------------------------------------------------------------------------------|----------------|--------------|-----------------------------------------------------------------------------|------------------------------------------------------------------------------------------------------------|----------------------------|-----|-----------------------|---------------|
|                                                                                            |                | Flower heads | Infusion (i.u.)                                                             | To provoke menstruation                                                                                    | 1 (PE)                     | No  | Sp-Su                 |               |
| <i>Artemisia absinthium</i> L. – MEA12                                                     | Assenzio       | Aerial part  | Rubbed onto the skin                                                        | To remove horse-flies and mosquitoes                                                                       | 1 (CP)                     | Yes | Al                    | Ru, he        |
| <i>Helminthotheca echioides</i> (L.) Holub LU3                                             | Spràina bianca | Leaves       | Poultice chewed and crushed (e.u.)                                          | On wounds                                                                                                  | 2 (PI)<br>2 (PG)<br>1 (CP) | No  | Sp-Su                 | Unc,<br>dra   |
| <i>Lactuca sativa</i> L. LU2                                                               | Insalata       | Leaves       | Cooked with “Strega” liqueur”                                               | On painful or inflamed gums                                                                                | 2 (PI)                     | No  | Al                    | Cu            |
| <i>Matricaria chamomilla</i> L. – MEA11                                                    | Campomilla     | Flower heads | Infusion with <i>Ceterach officinarum</i>                                   | After childbirth                                                                                           | 1 (PI)                     | No  | Al                    | Ru,<br>kigd   |
|                                                                                            |                | Flower heads | Infusion applied as enema                                                   | To clean the intestine                                                                                     | 1 (PE)                     | No  |                       |               |
|                                                                                            |                | Flower heads | Infusion (i.u.) with sugared almonds always odd numbers (1,3,5...)          | For colds                                                                                                  | 2 (AG)                     | Yes |                       |               |
|                                                                                            |                | Flower heads | Infusion                                                                    | Intestinal pains                                                                                           | 4 (PG)                     | Yes |                       |               |
|                                                                                            |                | Flower heads | Infusion (e.u.)                                                             | Vaginal washes and also in case of inflammation                                                            | 4 (PG)                     | No  |                       |               |
| <i>Petasites hybridus</i> (L.) Gaertner, B. Meyer et Scherb. subsp. <i>hybridus</i> – MEE2 | Cuoppazz’      | Leaves       | Fresh entire leaves in summer                                               | Worn in pants and shoes and on sores as refreshing agent                                                   | 4 (VG)                     | No  | Su                    | Da, di        |
| <i>Sonchus oleraceus</i> L. LU4                                                            | Cacigne        | Leaves       | In poultice boiled and mixed with bread crumbs (e.u.)                       | For insect and snake venom                                                                                 | 1 (PE)                     | No  |                       |               |
| <i>Tussilago farfara</i> L. MEA13                                                          | Cuoppo         | Leaves       | Infusion (i.u.)                                                             | Coughs                                                                                                     | 1 (PI)                     | No  | Sp-Su                 | Ro (on        |
|                                                                                            |                | Rhizome      | Decoction ( 3 roots of <i>T. farfara</i> , 3 of <i>Malva</i> , 3 of nettle) | Stomach pains                                                                                              | 2 (AG)                     | Yes | Al                    | clayey soils) |
| <b>Cruciferae</b>                                                                          |                |              |                                                                             |                                                                                                            |                            |     |                       |               |
| <i>Brassica oleracea</i> L. LU5                                                            | Verza          | Leaves       | Poultice cooked over embers and mixed with the hands                        | Applied on wounds and bruises                                                                              | 8 (PI)                     | No  | Al                    | Cu            |
| <b>Dipsacaceae</b>                                                                         |                |              |                                                                             |                                                                                                            |                            |     |                       |               |
| <i>Dipsacus fullonum</i> L. MEA1                                                           | Cardo          | Aerial part  | One plant was placed inside and another outside the window (divination)     | According to which plant flowered, a girl of marriage-able age would marry a fellow townsman or a stranger | 4 (PI)                     | No  | Before the flowe-ring | Dra,<br>unc   |
|                                                                                            |                | Aerial part  | As above but the inflorescence was singed                                   | Divination                                                                                                 | 2 (AG)                     | No  |                       |               |
| <b>Euphorbiaceae</b>                                                                       |                |              |                                                                             |                                                                                                            |                            |     |                       |               |

|                                             |                       |                                      |                                                                                                        |                                                                                                                                                    |                            |             |          |                             |
|---------------------------------------------|-----------------------|--------------------------------------|--------------------------------------------------------------------------------------------------------|----------------------------------------------------------------------------------------------------------------------------------------------------|----------------------------|-------------|----------|-----------------------------|
| <i>Euphorbia lathyris</i> L.<br>MEE1        | Tòtemaje<br>Tetemagle | Entire plant                         | Planted in kitchen-gardens                                                                             | It removes moles                                                                                                                                   | 1 (PE)<br>2 (PI)           | Yes         | -        | Me,<br>kigd<br>(cu),<br>unc |
| <b>Gentianaceae</b>                         |                       |                                      |                                                                                                        |                                                                                                                                                    |                            |             |          |                             |
| <i>Centaurium erythraea</i> Rafn. –<br>MEA9 |                       | Rhizome,<br>entire plant             | Decoction<br>(e.u; i.u.)                                                                               | Compresses on bruises,<br>pains, dislocations; fever,<br>anti-inflammatory (i.u.)                                                                  | 6 (PI)                     | Yes<br>Rare | Sp-Su    | Cl, ro,<br>mopa             |
|                                             |                       | Rhizome                              | Decoction (i.u.)                                                                                       | Fever                                                                                                                                              | 1 (PI)<br>2 (PS)           | Yes         |          |                             |
| <i>Gentiana verna</i> L.                    | Genzianella           | Plant in<br>bloom                    | Infusion (i.u.)                                                                                        | Depurative                                                                                                                                         | 4 (VG)                     | No          | Sp-Su    | Mopa                        |
| <b>Graminaceae</b>                          |                       |                                      |                                                                                                        |                                                                                                                                                    |                            |             |          |                             |
| <i>Cynodon dactylon</i> (L.) Pers. –<br>LU6 | Gramegna,<br>gramigna | Entire plant<br>including<br>rhizome | Decoction (i.u.)                                                                                       | Intestinal burnings                                                                                                                                | 2 (PI)<br>4 (VG)           | Yes         | Su-Fa    | Unc,<br>kigd,<br>vi         |
|                                             |                       | Rhizome                              | Decoction (i.u.)                                                                                       | Diuretic, for kidney stones                                                                                                                        | 3 (CH)<br>2 (PI)           | Yes         | Su-Fa    |                             |
|                                             |                       | Rhizome                              | Decoction (i.u.)                                                                                       | Depurative                                                                                                                                         | 2 (AG)                     | No          | Su-Fa    |                             |
|                                             |                       | Rhizome                              | Decoction (i.u.)                                                                                       | Diuretic, depurative                                                                                                                               | 2 (PE)<br>9 (PI)           | Yes         | Su-Fa    |                             |
|                                             |                       | Rhizome                              | Decoction (i.u.)                                                                                       | For nervous complaints<br>("Panacea")                                                                                                              | 1 (PE)                     | Yes         | Su-Fa    |                             |
|                                             |                       | Rhizome                              | Decoction (e.u.)                                                                                       | Washes to prevent hair<br>loss                                                                                                                     | 6 (PI)                     | No          | Sp-Su-Fa |                             |
|                                             |                       | Rhizome                              | Decoction (i.u.)                                                                                       | Cystitis of women                                                                                                                                  | 2(PI)                      | No          | Sp-Su-Fa |                             |
| <i>Hordeum vulgare</i> L. – LU7             | Orzo                  | Caryopsis                            | Roasted fruits were applied<br>hot on the chest enveloped<br>in a cloth                                | In case of respiratory<br>diseases (e.g. bronchitis)                                                                                               | 1(PI)                      | No          | Al       | Cu                          |
| <i>Sorghum bicolor</i> (L.) Moench<br>– LU8 | Saggina               | Stems                                | The broom was put<br>behind the door of the<br>house often with corncobs<br>(magical use)              | It was believed that<br>witches, before entering,<br>had to count the threads of<br>the broom and grains of<br>maize which would take<br>all night | 4 (PS)<br>2 (PI)           | Yes         | Al       | Cu                          |
| <i>Triticum aestivum</i> L. – LU9           | Grano                 | Caryopsis                            | Fruits were roasted and<br>applied hot to the chest<br>enveloped in a cloth or in<br>a small cloth bag | In case of respiratory<br>ailments (e.g. bronchitis)                                                                                               | 3 (PI)<br>4 (VG)<br>4 (PG) | No          | Al       | Cu                          |
|                                             |                       | Caryopsis                            | Poultice with hot water<br>(e.u.)                                                                      | Sore throat                                                                                                                                        | 4(VG)                      | No          | Al       |                             |

|                                           |           |                           |                                                                             |                                                                                                                   |                     |          |    |               |
|-------------------------------------------|-----------|---------------------------|-----------------------------------------------------------------------------|-------------------------------------------------------------------------------------------------------------------|---------------------|----------|----|---------------|
|                                           |           | Pericarp of the fruit     | Roasted bran applied to the skin                                            | Rheumatic pains                                                                                                   | 2 (PI)<br>4 (VG)    | No       | Al |               |
|                                           |           | Bran                      | Compress                                                                    | Pimples and pustules                                                                                              | 4 (PI)              | No       | Al |               |
|                                           |           | Caryopsis                 | Hens eggs and cheeses placed in large cases of wheat at the start of summer | To preserve eggs and cheeses (these would keep throughout the summer)                                             | 12 (PI, CA, PG, VG) | No       | Al |               |
|                                           |           | Bread                     | Poultice with sugar and saliva                                              | Wounds and gangrene (a lady claimed to have healed a serious infection by binding the wound with the preparation) | 3 (CH)              | No       | Al |               |
|                                           |           | Hot pericarp of the fruit | Compress                                                                    | Toothache                                                                                                         | 2 (PI)              | No       | Al |               |
| <i>Lolium</i> sp.                         | Gliuòglie | Caryopsis                 | Seeds were often mixed with wheat                                           | Sedative. If a person is slow, one says "ha mangiato pan de gliuòglie" (he's eaten the plant")                    | 2 (PI)              | No       | Su | Unc, fi       |
| <b>Juglandaceae</b>                       |           |                           |                                                                             |                                                                                                                   |                     |          |    |               |
| <i>Juglans regia</i> L. MEB8              | Noce      | Leaves                    | Macerated with saliva (e.u.)                                                | On pimples and pustules                                                                                           | 4 (PI)              | Yes rare | Al | Cu            |
|                                           |           | Leaves                    | Fresh leaves in cases where flour was kept                                  | Anti-parasitic use, to prevent the formation of worms                                                             | 4 (PE)              | No       |    |               |
|                                           |           | Leaves                    | Fresh leaves in cases of corns and pulses                                   | Anti-parasitic agent (insects, worms)                                                                             | 4 (AG)<br>2 (PI)    | No       |    |               |
|                                           |           | Leaves                    | Fresh leaves                                                                | On wounds as an antiseptic                                                                                        | 4 (VG)              | No       |    |               |
| <b>Labiatae</b>                           |           |                           |                                                                             |                                                                                                                   |                     |          |    |               |
| <i>Calamintha nepeta</i> (L.) Savi - LU10 | Menduccia | Leaves                    | Juice from a handful crushed and strained, with water (i.u.)                | Stomach pains, intestinal spasms                                                                                  | 2 (AG)              | Yes      | Al | Unc           |
| <i>Mentha longifolia</i> (L.) Huds. MEA5  | Menta     | Leaves                    | Infusion (i.u.)                                                             | Stomach pains                                                                                                     | 1 (PE)              | No       | Al | Da            |
| <i>Salvia officinalis</i> L. LU11         | Salvia    | Leaves                    | Fresh rubbed leaves                                                         | To clean and disinfect teeth / gums                                                                               | 2 (PI)<br>1 (PS)    | No       | Al | Ru, kigd (cu) |
| <b>Lauraceae</b>                          |           |                           |                                                                             |                                                                                                                   |                     |          |    |               |

|                                                          |           |             |                                                                               |                                                            |                            |          |       |           |
|----------------------------------------------------------|-----------|-------------|-------------------------------------------------------------------------------|------------------------------------------------------------|----------------------------|----------|-------|-----------|
| <i>Laurus nobilis</i> L.<br>LU12                         | Lauro     | Leaves      | Infusion (i.u.) with apple, chamomile, garlic (always odd numbers!)           | Fever, tussis, cold                                        | 2 (AG)                     | No       | Al    | Tewo      |
|                                                          |           | Dry leaves  | Decoction with fennel seeds and half a lemon                                  | Digestive                                                  | 6 (PI)                     | No       |       |           |
| <b>Leguminosae</b>                                       |           |             |                                                                               |                                                            |                            |          |       |           |
| <i>Cicer arietinum</i> L. LU13                           | Ceci      | Seeds       | As food (to be eaten in plenty)                                               | In case of kidney stones                                   | 1 (PI)                     | Yes      | Al    | Cu        |
| <i>Phaseolus vulgaris</i> L.<br>LU14.                    | Fasciuòle | Seeds       | "Scattone". Hot dish with homemade pasta and wine                             | Diet for coughs or bronchitis                              | 6 (VG)                     | No       | Al    | Cu        |
| <b>Liliaceae</b>                                         |           |             |                                                                               |                                                            |                            |          |       |           |
| <i>Allium sativum</i> L.<br>LU15                         | Héaglie   | Bulb        | Fresh crushed cloves with salt (e.u.)                                         | For chilblains                                             | 3 (PI)                     | Yes rare | Al    | Cu        |
|                                                          |           | Bulb        | Entire cloves                                                                 | Repellent agent on sacks of pulses                         | 6 (PI)                     | No       |       |           |
|                                                          |           | Bulb        | Fresh crushed cloves                                                          | For chilblains                                             | 4 (CH)                     | Yes      |       |           |
|                                                          |           | Bulb        | Cloves sewn to make a necklace (e.u.)                                         | To eliminate worms                                         | 4 (CH)<br>3 (AG)<br>8 (VG) | No       |       |           |
|                                                          |           | Bulb        | Crushed and put in a compress on the abdomen                                  | To eliminate worms                                         | 1 (PE)                     | No       |       |           |
|                                                          |           | Bulb        | Roasted, then rubbed on the abdomen                                           | To eliminate worms                                         | 1 (PE)                     | No       |       |           |
|                                                          |           | Bulb        | As food                                                                       | To regularize blood pressure                               | 4 (PI)                     | Yes      |       |           |
| <i>Allium cepa</i> L.<br>LU16                            |           | Bulb        | As food                                                                       | Refreshing for the intestine                               | 1 (PE)                     | Yes      | Al    | Cu        |
| <i>Allium ascalonicum</i> L. – LU17                      | Scalogno  | Bulb        | As food                                                                       | "To purify the blood"                                      | 1 (PI)                     | No       | Al    | Kigd (cu) |
| <b>Linaceae</b>                                          |           |             |                                                                               |                                                            |                            |          |       |           |
| <i>Linum usitatissimum</i> L.                            | Lino      | Seeds       | Crushed, mixed with olive oil and warmed until small lozenge is formed (e.u.) | Hot poultice with gauze on wounds or in case of bronchitis | 4 (PG)                     | No       | Al    | Once cu   |
|                                                          |           | Seeds       | Warmed over embers                                                            | Put on the chest in cases of bronchial catarrh             | 2 (PI)                     | No       |       |           |
| <b>Malvaceae</b>                                         |           |             |                                                                               |                                                            |                            |          |       |           |
| <i>Malva sylvestris</i> L. subsp. <i>sylvestris</i> MEA4 | Maula     | Aerial part | Decoction                                                                     | Constipation                                               | 2 (PI)<br>2 (PE)<br>4 (PG) | Yes      | Sp-Su | Unc       |

|                                 |        |                         |                                                                                 |                                                |                                      |     |       |            |
|---------------------------------|--------|-------------------------|---------------------------------------------------------------------------------|------------------------------------------------|--------------------------------------|-----|-------|------------|
|                                 |        | Aerial part             | Infusion                                                                        | Depurative, anti-septic                        | 4 (CH)                               | Yes | Sp-Su |            |
|                                 |        | Aerial part             | Infusion                                                                        | Intestinal pains                               | 5 (VG)                               | No  | Sp-Su |            |
|                                 |        | Aerial part             | Infusion for washes (often with chamomile)                                      | Intimate female hygiene also after childbirth  | 4 (CH)<br>3 (PI)                     | No  | Sp-Su |            |
|                                 |        | Aerial part             | Infusion for gargles                                                            | Mouth inflammations                            | 4 (CH)<br>4 (PI)                     | Yes | Sp-Su |            |
|                                 |        | Rhizome                 | Recipe, see <i>Tussilago farfara</i>                                            | Stomach pains                                  | 2 (AG)                               | Yes | Al    |            |
|                                 |        | Leaves                  | Poultice with decoction and bread crumb                                         | Wounds                                         | 1 (PE)<br>2 (PI)                     | No  | Al    |            |
|                                 |        | Aerial part             | After boiling as food (i.u.)                                                    | In case of constipation                        | 4 (PG)                               | No  | Al    |            |
|                                 |        | Dry flowers             | Decoction with dried figs (e.u.)                                                | Wounds                                         | 1 (PI)                               | No  | Sp-Su |            |
|                                 |        | Leaves                  | Boiled and seasoned with lemon as food                                          | To promote expulsion of the placenta           | 1 (PI)                               | No  | Sp-Su |            |
| <b>Moraceae</b>                 |        |                         |                                                                                 |                                                |                                      |     |       |            |
| <i>Cannabis sativa</i> L.       |        | Fibers ('stoppa')       | Poultice with albumen of egg as plaster; hardens as it dries                    | Often worn for various months                  | 1 (PE)<br>6 (PI)                     | No  | Al    | Once<br>Cu |
| <i>Ficus carica</i> L.<br>LU18  | Ficura | Latex                   | External use                                                                    | On insect bites (bee stings)                   | 4 (PI)<br>1 (PE)<br>2 (CH)<br>1 (AG) | Yes | Al    | Cu         |
|                                 |        | Dry syconiums           | Decoction with pieces of quinces, chamomile etc.                                | For fever (flu)                                | 7 (PI)<br>1 (CA)                     | Yes | Al    |            |
|                                 |        | Epicarp of the syconium | Macerated for one night in water; then drunk on an empty stomach in the morning | To facilitate digestion and treat constipation | 4 (CH)                               | No  | Su    |            |
|                                 |        | Dry syconiums           | Put in must to boil with apple and honey for a few minutes (i.u.)               | Bronchitis                                     | 4 (PI)                               | No  | Al    |            |
| <b>Oleaceae</b>                 |        |                         |                                                                                 |                                                |                                      |     |       |            |
| <i>Olea europaea</i> L.<br>LU19 | Olivo  | Oil                     | To massage forearms                                                             | Swollen glands (sore throat, fevers)           | 5 (PI)                               | Yes | Al    | Cu         |
|                                 |        | Oil                     | Hot oil (e.u.)                                                                  | For earache                                    | 3 (CH)<br>2 (PI)                     | Yes |       |            |
|                                 |        | Oil                     | Warmed in frying pan ('olio ferrato')                                           | Applied to small wounds                        | 6 (PI)                               | No  |       |            |
|                                 |        | Oil                     | Poultice                                                                        | Itching, also of intimate parts                | 4 (PI)                               | No  |       |            |

|                                                                           |                       |                   |                                                                   |                                             |                                                |            |       |            |
|---------------------------------------------------------------------------|-----------------------|-------------------|-------------------------------------------------------------------|---------------------------------------------|------------------------------------------------|------------|-------|------------|
|                                                                           |                       | Oil               | Beeswax warmed near a lamp to form an ointment                    | Burns                                       | 4 (PG)                                         | No         |       |            |
| <b>Papaveraceae</b>                                                       |                       |                   |                                                                   |                                             |                                                |            |       |            |
| <i>Papaver rhoeas</i> L. subsp. <i>rhoeas</i><br>LU20                     | Papambre              | Leaves and petals | Infusion                                                          | Sedative for children                       | 4 (CH)                                         | No         | Sp-Su | Unc, fi    |
|                                                                           |                       | Petals            | Infusion                                                          | Sedative                                    | 2 (AG)                                         | No         |       |            |
| <i>Chelidonium majus</i> L.<br>MEA3                                       | Erba porra            | Latex             | Fresh latex (e.u.)                                                | Sores, warts, insect bites                  | 2 (AG)<br>3 (CA)<br>3 (CH)<br>1 (AG)<br>4 (VG) | Yes        | Al    | Ru, shpl   |
| <b>Plantaginaceae</b>                                                     |                       |                   |                                                                   |                                             |                                                |            |       |            |
| <i>Plantago lanceolata</i> L.<br>MEB2<br><i>Plantago major</i> L.<br>MEE3 | Lingua di cane        | Fresh leaves      | External use                                                      | Cicatrizing agent for wounds                | 2 (PE)                                         | No         | Al    | Cl, ro, me |
| <b>Primulaceae</b>                                                        |                       |                   |                                                                   |                                             |                                                |            |       |            |
| <i>Cyclamen hederifolium</i> Aiton                                        |                       | Tuber             | Rubbed fresh tuber                                                | Chilblains                                  | 4 (PI)                                         | No         | Fa    | Shpl       |
| <b>Rosaceae</b>                                                           |                       |                   |                                                                   |                                             |                                                |            |       |            |
| <i>Crataegus monogyna</i> Jacq. –<br>MEC10                                | Ceracèlla             | Flowers           | Infusion (i.u.)                                                   | For tussis and in various recipes           | 4 (PI)                                         | No         | Sp    | He         |
| <i>Malus domestica</i> (Borkh.)<br>Borkh. – LU21                          |                       | Fruits            | Boiled in must with dried figs and honey for a few minutes (i.u.) | Bronchitis and serious respiratory ailments | 4 (PI)                                         | No         | Al    | Cu         |
| <i>Prunus dulcis</i> (Miller) D.A.<br>Webb – LU22                         |                       | Exocarp           | Decoction (i.u.) with walnut shells and dried figs                | Tussis and bronchitis                       | 4 (PG)                                         | No         | Al    | Cu         |
| <i>Rosa canina</i> L.<br>MEC8                                             | Cacavàsce             | Fruits            | Infusion                                                          | As a sedative tea                           | 4 (VG)                                         | Yes (rare) | Su    | Pa, he     |
| <i>Rubus ulmifolius</i> Schott<br>MEC11                                   | Ruvètaele<br>Moricole | Leaves            | Heated in a grill near embers (e.u.)                              | Applied to small wounds                     | 4 (PI)                                         | No         | Al    | He, Unc    |
|                                                                           | (the fruits)          | Leaves            | Fresh or chewed with bread and salt                               | Applied to small wound as a haemostatic     | 3 (AG)                                         | No         |       |            |
|                                                                           |                       | Leaves            | Fresh leaves                                                      | Applied to small wounds                     | 2 (PE)                                         | Yes        |       |            |
|                                                                           |                       | Leaves            | Fresh leaves                                                      | Applied on abscesses                        | 4 (PI)                                         | No         |       |            |
|                                                                           |                       | Leaves            | Decoction with dried figs and quinces (i.u.)                      | Tussis                                      | 1 (PI)                                         | No         |       |            |
| <b>Rutaceae</b>                                                           |                       |                   |                                                                   |                                             |                                                |            |       |            |



|                                                      |                 |                      |                                                                                                   |                                                            |                                    |     |       |           |
|------------------------------------------------------|-----------------|----------------------|---------------------------------------------------------------------------------------------------|------------------------------------------------------------|------------------------------------|-----|-------|-----------|
| <i>Citrus limon</i> (L.) Burm.<br>LU23               |                 | Epicarp of the fruit | Boiled for a long time with orange peel, bramble leaves, chamomile and dried figs to form a syrup | To treat tussis and bronchitis                             | 2 (PI)                             |     | Al    | Cu        |
| <i>Ruta graveolens</i> L.<br>LU24                    | Ruta            | Leaves               | Placed on the ground in the house                                                                 | To remove mice                                             | 4 (CH)                             | No  | Al    | Dra, rock |
| <b>Scrophulariaceae</b>                              |                 |                      |                                                                                                   |                                                            |                                    |     |       |           |
| <i>Verbascum thapsus</i> L.                          | Zampa dell'orso | Leaves               | Fried in olive oil (poultice applying the cooked oil)                                             | On swellings and bruises                                   | 3 (CH)                             | No  | Sp-Fa | Dra       |
|                                                      |                 | Leaves               | Decoction (e.u.)                                                                                  | Inflamed tendons                                           | 4 (VG)                             | No  | Al    |           |
| <b>Solanaceae</b>                                    |                 |                      |                                                                                                   |                                                            |                                    |     |       |           |
| <i>Capsicum frutescens</i> L.<br>LU25                | Peperoncino     | Fruits               | Entire dry or crumbled fruits                                                                     | In jars of herbs or pulses as anti-parasitic agent         | 6 (PI)                             | No  | Su    | Cu        |
| <i>Solanum tuberosum</i> L.<br>LU26                  | Patàne          | Tuber                | Slices of the fresh tuber (e.u.)                                                                  | Burns                                                      | 4 (CH)<br>4 (PI)<br>1 (PE)         | Yes | Al    | Cu        |
| <b>Umbelliferae</b>                                  |                 |                      |                                                                                                   |                                                            |                                    |     |       |           |
| <i>Foeniculum vulgare</i> Miller<br>LU28             | Finocchiello    | Seeds                | Decoction                                                                                         | As a digestive and for intestinal pains                    | 2 (PI)<br>1 (PS)                   | No  | Su    | Ru, me    |
| <i>Petroselinum crispum</i> (Miller) Fuss – LU29     | Petrusine       | Stem without leaves  | Placed in the anus as a mechanical clyster for babies                                             | Laxative (CA,CH), with a little soap or olive oil (PI, AG) | 3 (CA)<br>4 (CH)<br>6(PI)<br>2(AG) | Yes | Al    | Cu        |
|                                                      |                 | Leaves               | Ptisan (one informer said pregnant women must not eat it)                                         | To provoke abortion                                        | 6 (PI)                             | No  | Al    |           |
| <b>Urticaceae</b>                                    |                 |                      |                                                                                                   |                                                            |                                    |     |       |           |
| <i>Parietaria officinalis</i> L.<br>LU30             | Erba muraiola,  | Aerial part          | Decoction                                                                                         | (Flu) and sore throat                                      | 1 (PI)                             | No  | Al    | Wa, ru    |
| <i>Parietaria judaica</i> L. – LU31                  | erba murata     | Aerial part          | Infusion                                                                                          | For allergies                                              | 2(CH)                              | No  | Sp    |           |
| <i>Urtica dioica</i> L. subsp. <i>dioica</i><br>MEB7 | Ortica, 'rdica  | Aerial part          | Decoction (i.u.)                                                                                  | Spots on the skin                                          | 3 (PI)                             | No  | Al    | Unc,ru    |
|                                                      |                 | Aerial part          | Decoction                                                                                         | Wash for itching                                           | 4 (VG)                             | No  |       |           |
|                                                      |                 | Leaves               | Cooked leaves are eaten                                                                           | Anaemia                                                    | 3 (CA)                             | No  |       |           |
|                                                      |                 | Aerial part          | Fresh crushed                                                                                     | On swellings, rheumatic pains, paralysis                   | 3 (PE)<br>2 (CH)                   | No  |       |           |
|                                                      |                 | Aerial part          | Crushed in a mortar. Poultice (e.u.)                                                              | Sprains, bruises                                           | 4 (PI)                             | No  |       |           |

|                                          |            |                             |                                                                                                                                                                                                 |                                                                                                                                                  |        |            |       |        |
|------------------------------------------|------------|-----------------------------|-------------------------------------------------------------------------------------------------------------------------------------------------------------------------------------------------|--------------------------------------------------------------------------------------------------------------------------------------------------|--------|------------|-------|--------|
|                                          |            | Rhizome (3 roots)           | Decoction with 3 roots of mallow and 3 roots of <i>T. farfara</i>                                                                                                                               | Gastric pains                                                                                                                                    | 2 (AG) | Yes        |       |        |
|                                          |            | A piece of stem with leaves | In a preparation ("uèvr' ") with a nettle stem, one of ivy, a nail and the crest of a cock than never crows, gilded powder of a scratched bell, and a plant growing in wells similar to chicory | The ingredients were sewn into a small cloth bag of cloth and placed under children's pillows to protect them from witches (magic-religious use) | 1 (PI) | No         |       |        |
| <b>Valerianaceae</b>                     |            |                             |                                                                                                                                                                                                 |                                                                                                                                                  |        |            |       |        |
| <i>Valeriana officinalis</i> L.<br>MEA10 | Vallariena | Root or leaves              | Decoction (i.u.)                                                                                                                                                                                | Hypertension                                                                                                                                     | 1 (PE) | Yes        | Sp-Su | Da, cl |
| <b>Vitaceae</b>                          |            |                             |                                                                                                                                                                                                 |                                                                                                                                                  |        |            |       |        |
| <i>Vitis vinifera</i> L.<br>LU32         | Vite       | Vinegar                     | Compresses with water from the feet to the knees and on the forehead                                                                                                                            | Fever                                                                                                                                            | 3 (PI) | Yes (rare) | Al    | Cu     |
|                                          |            | Red wine or must            | Cooked until thick (i.u.)                                                                                                                                                                       | Very strong astringent in case of diarrhoea and dysentery                                                                                        | 4 (CH) | No         | Al    |        |
|                                          |            | Wine                        | External use                                                                                                                                                                                    | Wounds                                                                                                                                           | 1 (CP) | No         | Al    |        |
|                                          |            | Red wine                    | Hot wine with sugar (i.u.)                                                                                                                                                                      | Bronchitis                                                                                                                                       | 4 (PG) | No         | Al    |        |
|                                          |            | Red wine                    | Hot wine with wood cinders (e.u.); then used for fumigations and footbaths                                                                                                                      | Bronchitis, cold                                                                                                                                 | 4 (PG) | No         | Al    |        |
|                                          |            | Red wine                    | Hot poultice with salt, covered with a wool cloth soaked in wine                                                                                                                                | Rheumatic pains                                                                                                                                  | 2 (AG) | No         | Al    |        |
|                                          |            | Vinegar                     | Compresses, mouthwashes                                                                                                                                                                         | Fever (compresses), toothache (mouthwashes)                                                                                                      | 2 (AG) | No         | Al    |        |
|                                          |            | Vinegar                     | Compresses with hot water and salt                                                                                                                                                              | Dislocations                                                                                                                                     | 1 (AG) | No         | Al    |        |
|                                          |            | Unripe fruits               | Juice                                                                                                                                                                                           | Drunk as astringent in case of severe diarrhoeas                                                                                                 | 4 (PG) | No         | Su    |        |

**Abbreviations: Localities:** AG = Agnone; BA = Baranello; CA = Castiglione di Carovilli; CH = Chiauci; CP = Capracotta; PE = Pescolanciano; PG = Poggio Sannita; PI = Pietrabbondante; PS = Pescopennataro; RC = Riserva di Collemeluccio; VG = Vastogirardi **Way of use:** i.u. = internal use e.u. = external use **Period of**

**gathering** Sp= spring; Su= summer; Fa= fall; Wi= winter; Al=always **Habitat** Cle = Clearings; Coh = near country houses; Cu= cultivated areas; Da = damp areas; Di = ditches; Dra = dry areas; Fi = fields; Kigd = kitchen gardens; He = hedges; Me = meadows; Mopa = mountain pastures; Pa = pastures; Ro = roadsides; Rock = rocky slopes; Ru = ruins; Shpl = shady places; Tewo = thermophilous woods; Unc = uncultivated areas; Vi = vineyards; Wa = walls; We = wells; Wo = woods.
